# Supplementary material for: Identification of four potential predicting miRNA biomarkers for multiple myeloma from published datasets
Source: PeerJ. 2017 Jan 31;5:e2831. doi: 10.7717/peerj.2831 (PMC5289111; doi:10.7717/peerj.2831)
Supplement: Data S2 [file peerj-05-2831-s003.xlsx]

## Sheet: Up gene
UP genes
Gene Name	TF Regulation
DBI	AR
RUNX2	AR
PMEPA1	AR
IGFBP5	AR
PSAP	AR
AVP	AR
RARA	AR
SCNN1A	AR
TFRC	ARNT
NTS	ATF1
INHBA	ATF1
STAT3	ATF1
TH	ATF1
TFRC	ATF1
CYCS	ATF1
TH	ATF2
CCND1	ATF2
CD69	ATF3
TH	ATF4
NFE2L2	ATF4
SDC1	ATF4
CYCS	ATF4
SERP1	ATF6
MYB	BCL3
IL18	BCL6
ESR1	BRCA1
STAT3	BRCA1
PPARG	CDX1
CLDN2	CDX1
CLDN2	CDX2
PPARG	CEBPA
MYBL1	CEBPA
PCK2	CEBPA
CSRP2	CEBPA
G6PC	CEBPA
CLU	CEBPA
UCP1	CEBPA
ALOX5AP	CEBPA
ITGAL	CEBPA
ADIPOQ	CEBPA
IL12B	CEBPA
IL12B	CEBPB
UCP1	CEBPB
ALOX5AP	CEBPD
UCP1	CEBPD
ALOX5AP	CEBPE
MYB	CEBPE
DBH	CREB1
TFRC	CREB1
INHBA	CREB1
PCDHB11	CREB1
IL2	CREB1
G6PC	CREB1
TH	CREB1
CD68	CREB1
EDN1	CREB1
CRH	CREB1
CSRP2	CREB1
STAT3	CREB1
UCP1	CREB1
ACHE	CREB1
BDNF	CREB1
PTH	CREB1
NTS	CREB1
F3	CREB1
SQSTM1	CREB1
MOG	CREB1
CCND1	CREB1
HMGCS1	CREBBP
LDLR	CREBBP
CCND1	CREM
TH	CREM
DBH	CREM
IL2	CREM
CER1	CTNNB1
FADD	CTNNB1
CNN2	CTNNB1
EN2	CTNNB1
CXCL6	CTNNB1
EDN1	CTNNB1
PPARG	CTNNB1
SPN	CTNNB1
FGF20	CTNNB1
DPEP1	CTNNB1
EMX2	CTNNB1
STAT3	CTNNB1
FGF18	CTNNB1
CLDN2	CTNNB1
CYCS	CTNNB1
DAPK2	CTNNB1
EMP1	CTNNB1
FRK	CTNNB1
FOSL1	CTNNB1
RUNX2	CTNNB1
DBH	CTNNB1
FUT1	CTNNB1
FSCN1	CTNNB1
CCND3	CTNNB1
MLLT10	CTNNB1
NOTCH1	CTNNB1
CCND1	CTNNB1
AXIN2	CTNNB1
TTC9	CTNNB1
ITGB1	CTNNB1
MUC6	CTNNB1
LYZ	CTNNB1
BAMBI	CTNNB1
HTRA1	CTNNB1
IHH	CTNNB1
NTSR1	CTNNB1
BAG3	CTNNB1
BCL2L2	CTNNB1
RUNX2	DLX5
PPARG	E2F1
EGR1	E2F1
OPRM1	E2F1
CCND1	E2F1
MDM2	E2F1
SKP2	E2F1
AXIN2	E2F1
MCM5	E2F1
DAPK2	E2F1
CCNE1	E2F1
MYB	E2F1
CHEK1	E2F1
RAD51	E2F1
CCND3	E2F1
DHFR	E2F1
CCND3	E2F2
MCM5	E2F2
CCND3	E2F3
MCM5	E2F3
PPARG	E2F4
MCM5	E2F4
CCND1	E2F4
MYB	E2F4
DHFR	E2F4
CNGA2	EBF1
PPARG	EBF1
CD69	EGR1
RAD51	EGR1
TGFBR2	EGR1
F3	EGR1
ACHE	EGR1
TH	EGR1
ALDOC	EGR1
IL2	EGR1
MYB	EGR1
EGR1	EGR1
CEBPB	EGR1
FGF13	EGR1
DBH	EGR1
ALDOC	EGR2
CD69	EGR3
IL2	EGR4
CD68	ELF1
EGR1	ELK1
ACHE	ELK1
F3	ELK1
RUNX2	ELK1
RUNX2	EPAS1
CDH5	ERG
COL11A2	ERG
EGR1	ESR1
DFFB	ESR1
AVP	ESR1
CCND1	ESR1
CRH	ESR1
PPARG	ESR1
ISL1	ESR1
BDNF	ESR1
EGR1	ESR2
CRH	ESR2
LYZ	ETS1
CCND1	ETS1
FGL2	ETS1
TFRC	ETS1
FOSL1	ETS1
TGFBR2	ETS1
EGR1	ETS1
MYB	ETS1
PTHLH	ETS1
MDM2	ETS1
IL12B	ETS1
LCK	ETS1
LCP1	ETS1
RAD51	ETS1
UCP1	ETS1
TGFBR2	ETS2
IL12B	ETS2
FOSL1	ETS2
PTHLH	ETS2
TGFBR2	ETV4
MYB	ETV4
RAD51	ETV4
CD68	FLI1
MDM2	FLI1
TGFBR2	FLI1
NTS	FOS
IL12B	FOS
IL2	FOS
CD69	FOS
AVP	FOS
TH	FOS
DBH	FOS
TH	FOSB
FOSL1	FOSL1
MUC5B	FOSL2
SFTPB	FOXA1
G6PC	FOXA2
HHEX	FOXA2
G6PC	FOXM1
G6PC	FOXO1
MCM5	FOXO1
RBL2	FOXO1
BCL2L2	FOXO1
COL4A2	FOXO1
PSMB8	FOXO1
CCND1	FOXO1
DAPK1	FOXO1
IL18	FOXO1
RUNX2	FOXO1
ADIPOQ	FOXO1
HPD	FOXO1
SFRP1	FOXO1
CASP2	FOXO1
HBP1	FOXO3
BTG1	FOXO3
PHLDA1	FOXO3
BNIP3L	FOXO3
G6PC	FOXO3
CCND1	FOXO3
ESR1	FOXO3
RBL2	FOXO3
SFRP1	FOXO3
SATB1	FOXO3
RBL2	FOXO4
IL2	FOXP1
ACHE	GABPA
EPO	GATA1
HOXB2	GATA1
BTG2	GATA1
EPO	GATA2
PPARG	GATA2
DBH	GATA3
PPARG	GATA3
VLDLR	GLI1
RASL11B	GLI1
CLDN2	GLI1
NPDC1	GLI1
GATM	GLI1
EGR2	GLI1
NTRK2	GLI1
SFRP1	GLI1
CCND1	GLI2
LUM	GLI2
TGFBI	GLI2
CKS1B	GLI2
FGF13	GLI2
VIPR1	GLI2
EDN1	GLI2
EFNA1	GLI2
ATP9A	GLI2
ITGB1	GLI2
PPP1CB	GLI2
SPG20	GLI2
BLVRA	GLI2
MYB	HBP1
CCND1	HBP1
CCNE1	HBP1
CCND3	HBP1
AVP	HIF1A
TFRC	HIF1A
PGK1	HIF1A
EPO	HIF1A
TH	HIF1A
GC	HNF1A
G6PC	HNF1A
CLDN2	HNF1A
CYP1A2	HNF1A
GATM	HNF4A
NPNT	HNF4A
G6PC	HNF4A
EBP	HNF4A
CLDN2	HNF4A
HOXB1	HOXA1
EPHA2	HOXA1
EMX2	HOXA10
TH	HOXA5
PGR	HOXA5
HOXB1	HOXB1
EPHA2	HOXB1
ITGB1	HOXD3
SERPINF2	JUN
RUNX2	JUN
TTPA	JUN
MDM2	JUN
CD68	JUN
MYB	JUN
EDN1	JUN
CCND1	JUN
IL2	JUN
TGFBR2	JUN
CLU	JUN
TH	JUN
IL18	JUN
SMAD7	JUN
FOSL1	JUN
F3	JUN
CD68	JUNB
TH	JUNB
NTS	JUND
MUC5B	JUND
TH	JUND
F3	JUND
FOSL1	JUND
DAPK2	KLF6
PGK1	LEF1
ITGB1	LEF1
CCND1	LEF1
CLDN2	LEF1
IL2	LEF1
CCR5	LEF1
RUNX2	LEF1
MLLT10	LEF1
OSCAR	MITF
RARA	MYB
COL4A2	MYC
ITGB1	MYC
STK4	MYC
STOM	MYC
FAH	MYC
SEC23B	MYC
PPP1CB	MYC
PPP2CA	MYC
DCK	MYC
EEF2	MYC
PTPN1	MYC
KLF7	MYC
KLK10	MYC
DCTN3	MYC
VCP	MYC
DBP	MYC
ACHE	MYC
DBI	MYC
RPS15A	MYC
RPL31	MYC
AVP	MYC
EMP1	MYC
RARA	MYC
RAD51	MYC
MBNL1	MYC
SLC39A8	MYC
KPNA3	MYC
DFFB	MYC
FOSL1	MYC
HBP1	MYC
CCND1	MYC
ZFP36L1	MYC
PEX19	MYC
HMBS	MYC
CCNE1	MYC
GC	MYC
CCT3	MYC
POLDIP2	MYC
TFRC	MYC
CHRNA1	MYOD1
IL2	NFAM1
OSCAR	NFATC1
IL12B	NFATC1
TNFSF13B	NFATC1
IL2	NFATC1
IL2	NFATC2
TNFSF13B	NFATC2
CYP1A2	NFIA
IGFBP5	NFIC
CLU	NFIC
RUNX2	NFIC
CCND1	NFKB1
F3	NFKB1
MYB	NFKB1
IL12B	NFKB1
CD80	NFKB1
IRF1	NFKB1
IRF4	NFKB1
IL2	NFKB1
IL15	NFKB1
CD69	NFKB1
HMGCS1	NFYA
INSIG2	NR1H2
G6PC	NR1H2
PCK2	NR1H2
PCK2	NR1H3
INSIG2	NR1H3
G6PC	NR1H3
PAX2	NR2E1
EPO	NR2F1
CYP17A1	NR2F1
CRH	NR3C1
TH	NR4A2
CYP17A1	NR5A1
SMAD7	OLIG1
CRHR1	PAX2
RNMT	PAX3
ALDOC	PAX6
ITGB1	PAX6
IHH	PGR
DBH	PHOX2A
DBH	PHOX2B
TLX2	PHOX2B
CCND1	POU1F1
IL2	POU1F1
CCR5	POU1F1
FGL2	POU1F1
ALDOC	POU1F1
EIF4G2	POU1F1
CCR5	POU2F2
IL2	POU2F2
UTF1	POU5F1
NCOR2	PPARD
UCP1	PPARG
ESR1	PPARG
DBI	PPARG
TH	PTX3
SMPD1	RARA
BTG2	RARA
SFTPB	RARA
RARA	RARA
STAT3	RARA
TH	RARB
HOXA1	RARB
SFTPB	RARB
NPDC1	RARB
RARA	RARB
SFTPB	RARG
HOXA1	RARG
FJX1	RBPJ
HES7	RBPJ
GAMT	RBPJ
SKP2	RBPJ
DDX6	RBPJ
F3	REL
IL2	REL
IL12B	REL
IRF4	REL
F3	RELA
IL12B	RELA
IRF4	RELA
IL2	RELA
CCND1	RELA
EGR1	RELA
MYB	RELB
OPRM1	REST
TH	REST
ESR1	RUNX2
HOXA1	RXRA
HOXB1	RXRA
TH	RXRA
BTG2	RXRA
SIX3	SIX3
PPARG	SMAD1
BAMBI	SMAD1
SMAD7	SMAD1
SMAD7	SMAD2
CYP17A1	SMAD3
EDN1	SMAD3
EPO	SMAD3
SMAD7	SMAD3
PTHLH	SMAD3
ITGB1	SMAD3
BAMBI	SMAD3
ITGB5	SMAD4
PTHLH	SMAD4
BAMBI	SMAD4
SMAD7	SMAD4
PPARG	SMAD4
EPO	SMAD4
IHH	SMAD4
RNMT	SMAD7
EDNRB	SOX10
UTF1	SOX2
TH	SP1
PTHLH	SP1
MUC5B	SP1
LDLR	SP1
MYBL1	SP1
LCP1	SP1
PTH	SP1
F3	SP1
DBH	SP1
ACHE	SP1
UCP1	SP1
AVP	SP1
RARA	SP1
SCARF1	SP1
DCK	SP1
EPO	SP1
RUNX2	SP1
DFFB	SP1
DHFR	SP1
ESR1	SP1
ALDOC	SP1
CCND1	SP1
IL2	SP1
SP4	SP1
SPARC	SP1
CDH5	SP1
CYP17A1	SP1
IL12B	SP1
COL4A2	SP1
HOXB7	SP1
SPN	SP1
CYCS	SP1
CSRP2	SP1
TBXA2R	SP1
SMAD7	SP1
EGR1	SP1
FGL2	SP1
PRF1	SP1
PSAP	SP1
CLU	SP1
DAPK2	SP1
OPRM1	SP1
NTSR1	SP1
TGFBR2	SP1
CCND1	SP2
CYP17A1	SP3
DCK	SP3
CDH5	SP3
CCND1	SP3
TGFBR2	SP3
MUC5B	SP3
RECK	SP3
PSAP	SP3
OPRM1	SP3
PFKP	SP3
FGL2	SP3
RNMT	SP3
IL12B	SP3
HOXB7	SP3
CCND1	SP4
PSAP	SP4
CSF2RA	SPI1
MYB	SPI1
OPRM1	SPI1
GYPA	SPI1
IL12B	SPI1
TGFBR2	SPI1
CD68	SPI1
LDLR	SREBF1
HMGCS1	SREBF1
SLC25A1	SREBF1
HMGCS1	SREBF2
LDLR	SREBF2
EBP	SREBF2
EGR1	SRF
IRF1	STAT1
PRF1	STAT1
RNMT	STAT1
EIF2AK2	STAT1
IRF1	STAT2
IRF1	STAT3
PRF1	STAT3
STAT3	STAT3
CEBPB	STAT3
CCND1	STAT3
EHHADH	STAT3
PSAP	STAT5A
RAD51	STAT5A
RNMT	STAT5A
ESR1	STAT5A
TXNRD3	STAT5A
CSN1S1	STAT5A
MED22	STAT5A
PRF1	STAT5A
CCND1	STAT5A
CCND1	STAT5B
CSN1S1	STAT5B
RAD51	STAT5B
ESR1	STAT5B
PSAP	STAT5B
TXNRD3	STAT5B
MED22	STAT5B
RNMT	STAT5B
PRF1	STAT5B
PMF1	TBP
DHFR	TBP
LCP1	TBP
IL2	TBP
DBH	TBP
NTSR1	TCF3
NTSR1	TCF4
PPARG	TCF7
RUNX2	TCF7
FGF18	TCF7L2
EDN1	TCF7L2
CYCS	TCF7L2
AXIN2	TCF7L2
BAMBI	TCF7L2
BCL2L2	TCF7L2
NTSR1	TCF7L2
STAT3	TCF7L2
DAPK2	TCF7L2
TH	TFAP2A
B4GALT5	TFAP2A
ACHE	TFAP2A
MYB	TFAP2A
NME3	TFAP2A
PCDHB11	TFAP2A
SMPD1	TFAP2A
IGFBP5	TFAP2A
CRX	TFAP2A
HIP1	TFAP2A
CSRP2	TFAP2A
DBH	TFAP2A
CDH17	TFAP2A
IRAK2	TFAP2B
ESR1	TFAP2C
RAD51	TP53
NOTCH1	TP53
EGR1	TP53
MDM2	TP53
EPHA2	TP53
TRIAP1	TP53	Regulation
BAK1	TP53
CHEK1	TP53
STAT3	TP53
CCND1	TP53
B4GALT5	USF1
CHRNA7	USF1
AVP	USF1
DFFB	USF1
CYP1A2	USF1
ALDOC	USF1
BDNF	USF1
CCND1	USF1
HOXB7	USF1
AVP	USF2
DFFB	USF2
BDNF	USF2
B4GALT5	USF2
CHRNA7	USF2
CYP1A2	USF2
CBS	USF2
PMF1	VDR
MYB	WT1
EGR1	WT1
HMGCS1	YY1
LDLR	YY1
OPRM1	YY1
DBH	YY1
HOXB2	ZBTB16

## Sheet: Down gene
Down genes
Gene Name	TF Regulation
CYP7A1	CEBPA
ADH1B	CEBPA
CYBB	CEBPA
IGF1	CEBPA
SLC2A2	CEBPA
IGF1	CEBPB
CYP7A1	CEBPB
SLC2A2	CEBPB
ADH1B	CEBPB
IGF1	CEBPD
SPRY2	CREB1
HLA-DPB1	CREB1
DIO2	CREB1
ANGPTL2	CREB1
LECT2	CTNNB1
MMP7	CTNNB1
SCGB2A2	CTNNB1
DIO2	CTNNB1
NPPC	CTNNB1
KLF5	CTNNB1
GJA1	CTNNB1
MYF5	CTNNB1
BMP4	CTNNB1
BAG2	CTNNB1
CAPN2	CTNNB1
IGF1	CTNNB1
GPR64	CTNNB1
CASP3	CTNNB1
ADH1B	DBP
CALM1	E2F1
ATG12	E2F1
CALM1	E2F4
SLC2A2	EP300
BMP4	ETS1
SPRY2	ETS1
CASP3	ETS1
CYP3A4	FOXA1
CYP7A1	FOXA2
SLC2A2	FOXM1
CYP7A1	FOXM1
TNFSF10	FOXO1
CDKN2B	FOXO1
OSTN	FOXO1
SPRY2	FOXO1
CTSE	FOXO1
CASP3	FOXO1
TIMP3	FOXO1
BMP4	FOXO1
BMP4	FOXO3
TNFSF10	FOXO3
CDKN2B	FOXO3
CTSE	GATA1
CXCL14	GLI1
MYF5	GLI1
TMEM69	GLI1
ATG12	GLI1
EMB	GLI1
RGS4	GLI1
EFNB2	GLI1
TIMP3	GLI2
AKAP4	GLI2
MMP7	HNF1A
IGF1	HNF1A
SLC2A2	HNF1A
CYP7A1	HNF1A
CYP3A4	HNF1A
MMP7	HNF1B
DPP4	HNF1B
CYP3A4	HNF4A
CYP7A1	HNF4A
DIO2	HNF4A
DIO2	JUN
IL2RA	JUN
MMP7	JUN
MYF5	LEF1
MMP7	LEF1
NPPC	LEF1
CDKN2B	MYC
CDK6	MYC
PEX3	MYC
HAS2	MYC
HLA-DPB1	MYC
ACSL4	MYC
TOMM20	MYC
HSPA1A	MYC
GABRA6	NFIC
NPY1R	NFKB1
IL2RA	NFKB1
MAFA	NKX2-2
CASP3	NOTCH1
CYP7A1	NR1H2
CYP7A1	NR1H3
CYP7A1	NR2F2
BMP4	PAX3
SLC2A2	PDX1
KLF5	PGR
MYF5	POU1F1
GABRA6	POU2F1
CYP7A1	PPARA
SLC2A2	PPARG
CYP7A1	RARA
DIO2	RBPJ
CASP3	RBPJ
IL2RA	REL
TNFSF10	REL
IL2RA	RELA
KLF5	RUNX2
GJA1	SMAD1
TIMP3	SMAD2
TIMP3	SMAD3
TIMP3	SMAD4
CDK6	SMAD6
CYP3A4	SP1
GJA1	SP1
CASP3	SP1
SPRY2	SP1
KLF5	SP1
HSF1	SP1
HSPA1A	SP1
CYP7A1	SP1
CYBB	SPI1
CTSE	SPI1
IL2RA	STAT1
STAT1	STAT1
IGF1	STAT2
IL2RA	STAT3
IL2RA	STAT5A
IGF1	STAT5A
IGF1	STAT5B
IL2RA	STAT5B
DIO2	TBP
CAPN2	TCF7L2
MMP7	TCF7L2
CASP3	TCF7L2
CYP3A4	TFAP2A
HSPA1A	TFAP2A
SPRY2	TFAP2A
ADH1B	USF1
CTSE	YY1
