# Supplementary material for: Identification of four potential predicting miRNA biomarkers for multiple myeloma from published datasets
Source: PeerJ. 2017 Jan 31;5:e2831. doi: 10.7717/peerj.2831 (PMC5289111; doi:10.7717/peerj.2831)
Supplement: Table S1 [file peerj-05-2831-s002.xlsx]

## Sheet: Sheet1
Table S1. DEM distribution for the seven Multiple myeloma datasets
	Upregulated miRNAs							Downregulated miRNAs
	Dataset1	Dataset2	Dataset3	Dataset4	Dataset5	Dataset6	Dataset7	Dataset1	Dataset2	Dataset3	Dataset4	Dataset5	Dataset6	Dataset7
hsa-miR-1	-	-	-	-	-	-	Y	-	-	-	-	-	-	-
hsa-miR-100	-	-	-	Y	-	-	Y	-	-	-	-	-	-	-
hsa-miR-101	-	-	-	Y	-	-	-	-	-	-	-	-	-	-
hsa-miR-103	-	-	-	Y	-	-	-	-	-	-	-	-	-	-
hsa-miR-106a	Y	-	-	Y	-	-	-	-	-	-	-	-	-	-
hsa-miR-106b	Y	-	-	Y	-	-	Y	-	-	-	Y	-	-	-
hsa-miR-107	-	-	-	Y	-	-	-	-	-	-	-	-	-	-
hsa-miR-1207	-	-	Y	-	-	-	-	-	-	-	-	-	-	-
hsa-miR-122	-	-	-	Y	-	-	-	-	-	-	-	-	-	-
hsa-miR-1227	-	-	-	-	-	-	Y	-	-	-	-	-	-	-
hsa-miR-1234	-	-	-	-	-	-	Y	-	-	-	-	-	-	-
hsa-miR-125a	-	-	-	-	-	-	-	-	-	-	Y	-	-	-
hsa-miR-125b	-	-	-	Y	-	Y	Y	-	-	-	Y	-	-	-
hsa-miR-128a	-	-	-	-	-	-	Y	-	-	-	-	-	-	-
hsa-miR-128b	-	-	-	-	-	-	Y	-	-	-	-	-	-	-
hsa-miR-129	-	-	-	-	-	-	Y	-	-	-	-	-	-	-
hsa-miR-130a	-	-	-	Y	-	-	Y	-	-	-	-	-	-	-
hsa-miR-130b	Y	-	-	Y	-	-	Y	-	-	-	-	-	-	-
hsa-miR-133a	-	-	-	Y	-	-	Y	-	-	-	-	-	-	-
hsa-miR-133b	-	-	-	Y	-	-	Y	-	-	-	-	Y	-	-
hsa-miR-135a	-	-	-	-	-	-	Y	-	-	-	Y	-	-	-
hsa-miR-135b	-	-	-	-	-	-	Y	-	-	-	Y	Y	-	-
hsa-miR-137	-	-	-	-	-	-	-	-	-	-	Y	-	-	-
hsa-miR-138	Y	-	-	Y	-	Y	-	-	-	-	-	-	-	-
hsa-miR-139	-	-	-	-	-	-	-	-	-	-	Y	-	-	-
hsa-miR-140	-	-	-	-	-	-	Y	-	-	-	Y	-	-	-
hsa-miR-141	-	-	-	-	-	-	Y	-	-	-	-	-	-	-
hsa-miR-142	-	-	-	Y	-	-	Y	-	-	-	-	-	-	-
hsa-miR-143	-	-	-	-	-	-	-	-	-	-	-	-	-	Y
hsa-miR-146a	-	-	-	Y	-	-	Y	-	-	-	-	Y	-	-
hsa-miR-147	-	-	-	Y	-	-	-	-	-	-	-	-	-	-
hsa-miR-148a	-	Y	-	-	-	-	-	-	-	-	-	-	-	-
hsa-miR-150	-	-	-	-	-	Y	-	-	-	-	-	-	-	-
hsa-miR-151	-	-	-	-	-	-	Y	-	-	-	-	-	-	-
hsa-miR-155	-	-	-	-	-	-	-	-	-	-	-	Y	-	-
hsa-miR-15a	-	-	-	-	-	-	-	-	-	-	-	-	-	Y
hsa-miR-15b	Y	-	-	Y	-	Y	-	-	-	-	-	-	-	-
hsa-miR-16	-	-	-	Y	-	-	-	-	-	Y	-	-	-	Y
hsa-miR-17	Y	-	-	Y	-	-	-	-	-	-	-	-	-	-
hsa-miR-181a	-	Y	-	Y	-	Y	Y	-	-	-	Y	-	-	-
hsa-miR-181b	-	-	-	Y	-	Y	-	-	-	-	-	-	-	-
hsa-miR-181d	-	-	-	-	-	Y	-	-	-	-	-	-	-	-
hsa-miR-182	-	-	-	-	-	-	Y	-	-	-	-	-	-	-
hsa-miR-183	Y	-	-	Y	-	-	Y	-	-	-	-	-	-	-
hsa-miR-188	-	-	-	-	-	Y	Y	-	-	-	Y	-	-	-
hsa-miR-18a	Y	-	-	-	-	-	Y	-	-	-	-	-	-	-
hsa-miR-18b	Y	-	-	-	-	-	-	-	-	-	-	-	-	-
hsa-miR-190b	-	-	-	-	-	-	Y	-	-	-	-	-	-	-
hsa-miR-191	-	-	-	Y	-	Y	Y	-	-	-	-	-	-	-
hsa-miR-192	-	-	-	Y	-	-	Y	-	-	-	-	-	-	-
hsa-miR-193a	-	-	-	Y	-	-	-	-	-	-	Y	Y	-	-
hsa-miR-193b	Y	-	-	-	-	-	-	-	-	-	-	-	-	-
hsa-miR-194	-	-	-	-	-	-	Y	-	-	-	Y	-	-	-
hsa-miR-195	-	-	-	Y	-	Y	-	-	-	-	-	-	-	-
hsa-miR-196b	-	-	-	-	-	-	-	-	-	-	Y	Y	-	-
hsa-miR-197	-	-	-	-	-	Y	-	-	-	-	-	-	-	-
hsa-miR-198	-	-	-	-	-	Y	-	-	-	-	Y	-	-	-
hsa-miR-19a	Y	-	-	Y	-	-	Y	-	-	-	-	-	-	-
hsa-miR-19b	-	-	-	Y	-	-	Y	-	-	Y	-	-	-	-
hsa-miR-200a	-	-	-	-	-	-	Y	-	-	-	-	-	-	-
hsa-miR-200b	-	-	-	-	-	-	Y	-	-	-	-	-	-	-
hsa-miR-200c	-	-	-	-	-	-	Y	-	-	-	-	-	-	-
hsa-miR-202	-	-	-	-	-	Y	-	-	-	-	-	-	-	-
hsa-miR-203	-	-	-	-	-	-	Y	-	-	-	-	Y	-	-
hsa-miR-205	-	-	-	-	-	-	Y	-	-	-	-	-	-	-
hsa-miR-206	-	-	-	-	-	-	Y	-	-	-	-	-	-	-
hsa-miR-208	-	-	-	Y	-	-	-	-	-	-	-	-	-	-
hsa-miR-20a	Y	Y	-	Y	-	-	-	-	-	Y	-	-	-	-
hsa-miR-20b	Y	-	-	-	-	-	Y	-	-	-	-	-	-	-
hsa-miR-21	-	-	-	Y	-	-	Y	-	-	-	Y	-	-	-
hsa-miR-210	-	-	-	-	-	-	Y	-	-	-	-	-	-	-
hsa-miR-212	-	-	-	-	-	Y	Y	-	-	-	-	-	-	-
hsa-miR-214	-	-	-	Y	-	-	-	-	-	-	-	Y	-	-
hsa-miR-217	-	-	-	-	-	-	-	-	-	-	Y	-	-	-
hsa-miR-218	-	-	-	-	-	-	Y	-	-	-	-	-	-	-
hsa-miR-219	-	-	-	-	-	-	-	-	-	-	Y	-	-	-
hsa-miR-22	-	-	-	-	-	-	-	Y	-	Y	-	-	-	-
hsa-miR-220	-	-	-	-	-	-	Y	-	-	-	-	-	-	-
hsa-miR-221	-	Y	-	Y	-	Y	Y	-	-	-	-	-	-	-
hsa-miR-222	-	-	-	-	-	Y	Y	-	-	-	-	-	-	-
hsa-miR-223	-	-	-	-	-	-	-	Y	-	Y	Y	-	-	Y
hsa-miR-23a	-	-	-	Y	-	Y	-	-	-	-	Y	-	-	-
hsa-miR-23b	-	-	-	Y	-	-	-	-	-	-	-	-	-	-
hsa-miR-25	Y	-	-	Y	-	Y	-	-	-	-	-	-	-	-
hsa-miR-26a	-	-	-	Y	-	-	-	-	-	-	Y	-	-	-
hsa-miR-26b	-	-	-	Y	-	-	-	-	-	-	-	-	-	-
hsa-miR-27a	-	-	-	Y	-	-	Y	-	-	-	-	-	-	-
hsa-miR-27b	-	-	-	Y	-	-	Y	-	-	-	-	-	-	-
hsa-miR-28	-	-	-	-	-	-	Y	-	-	-	-	-	-	-
hsa-miR-296	-	-	-	-	-	-	-	-	-	-	Y	-	-	Y
hsa-miR-299	-	-	-	-	-	-	-	-	-	-	Y	-	-	-
hsa-miR-29a	-	-	-	Y	-	-	-	-	-	-	-	-	-	-
hsa-miR-29c	-	-	-	Y	-	-	-	Y	-	-	-	-	-	-
hsa-miR-300	-	-	-	-	-	-	Y	-	-	-	-	-	-	-
hsa-miR-301a	-	-	-	-	-	-	-	-	-	-	Y	-	-	-
hsa-miR-302a	-	-	-	-	-	-	-	-	-	-	Y	-	-	-
hsa-miR-302c	-	-	-	-	-	-	-	-	-	-	Y	-	-	-
hsa-miR-30a	-	-	-	Y	-	Y	-	-	-	-	-	-	-	-
hsa-miR-30b	-	-	-	-	-	Y	-	-	-	-	Y	-	-	-
hsa-miR-30c	-	-	-	Y	-	-	-	-	-	-	-	-	-	-
hsa-miR-30d	-	-	-	Y	-	Y	-	-	-	-	-	-	-	-
hsa-miR-30e	-	-	-	Y	-	-	Y	-	-	-	-	-	-	-
hsa-miR-31	-	-	-	-	-	-	Y	-	-	-	-	-	-	-
hsa-miR-32	-	-	-	Y	-	-	Y	Y	-	-	-	-	-	-
hsa-miR-320	-	-	-	Y	-	-	Y	-	-	-	-	-	-	-
hsa-miR-323	-	-	-	-	-	-	-	-	-	-	Y	-	-	-
hsa-miR-324	-	-	-	-	-	Y	-	-	-	-	Y	-	-	-
hsa-miR-328	-	-	-	-	-	Y	-	-	-	-	Y	-	-	-
hsa-miR-335	-	-	-	-	-	-	Y	-	-	-	Y	-	-	-
hsa-miR-337	-	-	-	-	-	-	-	-	-	-	-	-	-	Y
hsa-miR-338	-	-	-	-	-	-	Y	-	-	-	-	-	-	-
hsa-miR-33a	-	-	-	Y	-	-	-	-	-	-	-	-	-	-
hsa-miR-340	-	-	-	-	-	-	Y	-	-	-	-	-	-	-
hsa-miR-342	-	-	-	Y	-	-	Y	-	-	-	-	Y	-	-
hsa-miR-34a	-	-	-	-	-	-	Y	-	-	-	-	-	-	-
hsa-miR-34b	-	-	-	Y	-	-	Y	-	-	-	-	-	-	-
hsa-miR-34c	-	-	-	-	-	-	Y	-	-	-	-	-	-	-
hsa-miR-361	-	-	-	-	-	-	Y	-	-	-	-	-	-	-
hsa-miR-365	Y	-	-	-	-	Y	-	-	-	-	-	-	-	-
hsa-miR-3656	-	-	Y	-	-	-	-	-	-	-	-	-	-	-
hsa-miR-367	-	-	-	-	-	-	-	-	-	-	Y	-	-	-
hsa-miR-369	-	-	-	-	-	-	-	-	-	-	-	-	-	Y
hsa-miR-370	-	-	-	-	-	-	-	-	-	-	-	-	Y	-
hsa-miR-371	-	-	-	-	-	-	-	-	-	-	-	-	-	Y
hsa-miR-373	-	-	-	-	-	-	-	-	-	-	-	-	-	Y
hsa-miR-374a	-	-	-	-	-	-	-	-	-	-	Y	-	-	-
hsa-miR-375	-	-	-	-	-	-	-	-	-	-	-	Y	-	-
hsa-miR-376c	-	-	-	Y	-	-	-	-	-	-	-	-	-	-
hsa-miR-378	-	-	-	-	-	-	Y	-	-	-	-	-	-	Y
hsa-miR-412	-	-	-	-	-	-	Y	-	-	-	-	-	-	-
hsa-miR-421	-	-	-	-	-	-	Y	-	-	-	-	-	-	-
hsa-miR-424	Y	-	-	-	-	-	-	-	-	-	-	-	-	-
hsa-miR-425	Y	-	-	-	-	-	-	-	-	-	-	-	-	-
hsa-miR-432	-	-	-	-	-	-	Y	-	-	-	-	-	-	-
hsa-miR-451	-	-	-	-	-	-	-	-	-	Y	-	-	-	-
hsa-miR-452	-	-	-	-	-	-	Y	-	-	-	-	-	-	-
hsa-miR-454	-	-	-	-	-	-	Y	-	-	-	-	-	-	-
hsa-miR-455	-	-	-	-	-	-	-	-	-	-	-	-	-	Y
hsa-miR-483	-	-	Y	-	-	-	-	-	-	-	-	-	-	-
hsa-miR-485	-	-	-	-	-	-	-	-	-	-	-	-	-	Y
hsa-miR-487b	-	-	-	-	-	Y	-	-	-	-	-	-	-	-
hsa-miR-499	-	-	-	-	-	-	Y	-	-	-	-	-	-	-
hsa-miR-502	-	-	-	-	-	-	Y	-	-	-	-	-	-	-
hsa-miR-509	-	-	-	-	-	Y	-	-	-	-	-	-	-	-
hsa-miR-513	-	-	-	-	-	Y	-	-	-	-	-	-	-	-
hsa-miR-515	-	-	-	-	-	-	Y	-	-	-	-	-	-	-
hsa-miR-516	-	-	-	-	-	-	-	-	-	-	-	-	-	Y
hsa-miR-518d	-	-	-	-	-	-	-	-	-	-	-	-	-	Y
hsa-miR-519d	-	-	-	-	-	-	-	-	-	-	-	-	-	Y
hsa-miR-520b	-	-	-	-	-	-	-	-	-	-	-	-	-	Y
hsa-miR-520d	Y	-	-	-	-	-	-	-	-	-	-	-	-	-
hsa-miR-520g	-	-	-	-	-	-	-	-	-	-	-	-	-	Y
hsa-miR-520h	-	-	-	-	-	-	-	-	-	-	-	-	-	Y
hsa-miR-524	-	-	-	-	-	-	-	-	-	-	-	-	-	Y
hsa-miR-532	-	-	-	-	-	-	Y	-	-	-	-	-	-	-
hsa-miR-548d	-	-	-	-	-	-	Y	-	-	-	-	-	-	-
hsa-miR-549	-	-	-	-	-	-	Y	-	-	-	-	-	-	-
hsa-miR-574	-	-	-	-	-	Y	Y	-	-	-	-	-	-	-
hsa-miR-575	-	-	-	-	-	Y	-	-	-	-	-	-	-	-
hsa-miR-576	-	-	-	-	-	-	Y	-	-	-	-	-	-	-
hsa-miR-590	-	-	-	-	-	-	Y	-	-	-	-	-	-	-
hsa-miR-593	-	-	-	-	-	-	Y	-	-	-	-	-	-	-
hsa-miR-603	-	-	-	-	-	-	Y	-	-	-	-	-	-	-
hsa-miR-608	-	-	-	-	-	-	Y	-	-	-	-	-	-	-
hsa-miR-610	-	-	-	-	-	-	Y	-	-	-	-	-	-	-
hsa-miR-616	-	-	-	-	-	-	Y	-	-	-	-	-	-	-
hsa-miR-621	-	-	-	-	-	-	Y	-	-	-	-	-	-	-
hsa-miR-623	-	-	-	-	-	Y	-	-	-	-	-	-	-	-
hsa-miR-624	-	-	-	-	-	-	-	-	-	-	-	-	-	Y
hsa-miR-625	-	Y	-	-	-	-	Y	-	-	-	-	-	-	-
hsa-miR-628	-	-	-	-	-	-	Y	-	-	-	-	-	-	-
hsa-miR-629	-	-	-	-	-	-	Y	-	-	-	-	-	-	-
hsa-miR-630	-	-	Y	-	-	-	-	-	-	-	-	-	-	-
hsa-miR-631	-	-	-	-	-	-	Y	-	-	-	-	-	-	-
hsa-miR-634	-	-	-	-	-	-	Y	-	-	-	-	-	-	-
hsa-miR-649	-	-	-	-	-	-	Y	-	-	-	-	-	-	-
hsa-miR-650	-	-	-	-	-	-	-	-	-	-	-	Y	-	-
hsa-miR-652	-	-	-	-	-	-	Y	-	-	-	-	-	-	-
hsa-miR-660	-	-	-	-	-	-	Y	-	-	-	-	-	-	-
hsa-miR-671	-	-	-	-	-	Y	-	-	-	-	-	-	-	-
hsa-miR-7	Y	-	-	-	-	-	Y	-	-	-	-	-	-	-
hsa-miR-708	-	-	-	-	-	-	Y	-	-	-	-	-	-	-
hsa-miR-720	-	-	-	-	-	-	-	-	-	Y	-	-	-	-
hsa-miR-760	-	-	-	-	-	-	Y	-	-	-	-	-	-	-
hsa-miR-765	-	-	-	-	-	Y	-	-	-	-	-	-	-	-
hsa-miR-766	-	-	-	-	-	Y	-	-	-	-	-	-	-	-
hsa-miR-768	-	-	-	-	-	-	-	Y	-	-	-	-	-	-
hsa-miR-877	-	-	-	-	-	-	Y	-	-	-	-	-	-	-
hsa-miR-885	-	-	-	-	-	-	Y	-	-	-	-	-	-	-
hsa-miR-888	-	-	-	-	-	-	Y	-	-	-	-	-	-	-
hsa-miR-891a	-	-	-	-	-	-	Y	-	-	-	-	-	-	-
hsa-miR-9	-	-	-	-	-	-	Y	-	-	-	-	-	-	-
hsa-miR-92	-	-	-	-	-	Y	-	-	-	-	-	-	-	-
hsa-miR-92a	Y	-	-	Y	-	-	-	-	-	Y	-	-	-	-
hsa-miR-93	Y	-	-	Y	-	-	-	-	-	-	-	-	-	-
hsa-miR-95	-	-	-	Y	-	-	-	-	-	-	-	-	-	-
hsa-miR-98	-	-	-	-	-	-	Y	-	-	-	-	-	-	-
hsa-miR-99a	-	-	-	-	-	Y	Y	-	-	-	-	-	-	-
hsa-miR-99b	-	Y	-	-	-	-	-	-	-	-	-	-	-	-
Note: "Y" indicated that it was DEM in the relative dataset.
